# Supplementary material
Source: PubMed Central journal article supplement (PMC8445777)
Supplement: mmc1.pdf [file mmc1.pdf]

# Resident Perceptions on the Impact of COVID-19 Crisis

## Surgery, Anesthesia, and Surgical Subspecialty Residents

Age

\_\_\_\_\_

Gender

- Male  
 Female

Clinical Resident Year (year of clinical training position in respective residency program)

\_\_\_\_\_

## COVID-19 IMPACT (March 15 - May 4)

1 Strongly Disagree      2 Disagree      3 Neither Agree nor Disagree      4 Agree      5 Strongly Agree

My residency training has been significantly impacted due to the COVID-19 pandemic

- 

Have you been redeployed outside of your specialty?

- Yes  
 No

How have you been redeployed? Select all that apply

Includes all critical care units)  
 Critical care surgery service  
 Critical care medicine service

Where were you redeployed?

\_\_\_\_\_

Residency Training Program

- General Surgery  
 Plastic Surgery  
 Cardiothoracic Surgery  
 Orthopedic Surgery  
 Oral Maxillofacial Surgery  
 Urology  
 Podiatry  
 Anesthesiology

# Resident Perceptions on the Impact of COVID-19 Crisis

## Surgical, Anesthesia, and Surgical Subspecialty Training

### COVID-19 Pandemic (March 15 - May 4)

What is the average number of operations that you performed (or provided anesthesia for) prior to the COVID-19 pandemic (per week)?

0  
 1-5  
 6-10  
 11-15  
 16-20  
 20+

What is the average number of operations that you are performing (or provided anesthesia for) now? (per week)

0  
 1-5  
 6-10  
 11-15  
 16-20  
 20+

What is the average number of procedures (i.e. central lines, arterial lines) you were performing pre-COVID pandemic? (per week)

0  
 1-5  
 6-10  
 11-15  
 16-20  
 20+

What is the average number of procedures (i.e. central lines, arterial lines) you are performing now? (per week)

0  
 1-5  
 6-10  
 11-15  
 16-20  
 20+

Do you believe you have experienced a reduction in operative (or anesthesia-based) technical skill due to the impact of the COVID-19 crisis on your technical training?

Yes  
 No

|                                                                                          | 1 No Reduction        | 2 Very Little Reduction | 3 Moderate Reduction  | 4 Large Reduction     | 5 Very Large Reduction |
|------------------------------------------------------------------------------------------|-----------------------|-------------------------|-----------------------|-----------------------|------------------------|
| How would you assess the impact on your operative (or anesthesia-based) technical skill? | <input type="radio"/> | <input type="radio"/>   | <input type="radio"/> | <input type="radio"/> | <input type="radio"/>  |

# Resident Perceptions on the Impact of COVID-19 Crisis

## Impact of COVID-19 on Residency Training

|                                                                                                                                                                                | 1 Strongly Disagree   | 2 Disagree            | 3 Neither Agree nor Disagree | 4 Agree               | 5 Strongly Agree      |
|--------------------------------------------------------------------------------------------------------------------------------------------------------------------------------|-----------------------|-----------------------|------------------------------|-----------------------|-----------------------|
| My operative (or anesthesia-based) training has been negatively impacted due to the COVID-19 pandemic.                                                                         | <input type="radio"/> | <input type="radio"/> | <input type="radio"/>        | <input type="radio"/> | <input type="radio"/> |
| I am concerned to return back to the operating room (to operate or provide anesthesia) with worse skills compared to before the COVID-19 pandemic.                             | <input type="radio"/> | <input type="radio"/> | <input type="radio"/>        | <input type="radio"/> | <input type="radio"/> |
| I am concerned about my surgical skills (or anesthesia-based skills) for progression to the next clinical year due to performing less operations due to the COVID-19 pandemic. | <input type="radio"/> | <input type="radio"/> | <input type="radio"/>        | <input type="radio"/> | <input type="radio"/> |
| I am concerned about my ability to practice independently as an attending physician due to interruptions in training secondary to the COVID-19 pandemic.                       | <input type="radio"/> | <input type="radio"/> | <input type="radio"/>        | <input type="radio"/> | <input type="radio"/> |
| I am concerned about achieving the required ACGME operative (or anesthesia) case requirements due to the impact of the COVID-19 pandemic.                                      | <input type="radio"/> | <input type="radio"/> | <input type="radio"/>        | <input type="radio"/> | <input type="radio"/> |

Do you believe you have experienced an improvement in the management of critical care patients due to the impact of the COVID-19 crisis on your residency training?

Yes  
 No

|                                                                                    | 1 No Improvement      | 2 Very Little Improvement | 3 Moderate Improvement | 4 Large Improvement   | 5 Very Large Improvement |
|------------------------------------------------------------------------------------|-----------------------|---------------------------|------------------------|-----------------------|--------------------------|
| How would you assess the impact on your ability to manage a critical care patient? | <input type="radio"/> | <input type="radio"/>     | <input type="radio"/>  | <input type="radio"/> | <input type="radio"/>    |

---

**Impact on Critical Care Management**

---

|                                                                                                           | 1 Not Confident       | 2 Somewhat Confident  | 3 Moderately Confident | 4 Very Confident      | 5 Extremely Confident |
|-----------------------------------------------------------------------------------------------------------|-----------------------|-----------------------|------------------------|-----------------------|-----------------------|
| How would you describe your confidence in managing critical care patients prior to the COVID-19 pandemic? | <input type="radio"/> | <input type="radio"/> | <input type="radio"/>  | <input type="radio"/> | <input type="radio"/> |
| How would you describe your confidence in managing critical care patients now?                            | <input type="radio"/> | <input type="radio"/> | <input type="radio"/>  | <input type="radio"/> | <input type="radio"/> |

---

**Impact of Procedures**

---

|                                                                                                                                                           | 1 Strongly Disagree   | 2 Disagree            | 3 Neither Agree nor Disagree | 4 Agree               | 5 Strongly Agree      |
|-----------------------------------------------------------------------------------------------------------------------------------------------------------|-----------------------|-----------------------|------------------------------|-----------------------|-----------------------|
| I believe that performing procedures (i.e. central lines, arterial lines) has a positive effect on maintaining my operative (or anesthesia-based) skills. | <input type="radio"/> | <input type="radio"/> | <input type="radio"/>        | <input type="radio"/> | <input type="radio"/> |

---

What kind of activities, if any, are you doing to help maintain your skills? (check all that apply)

- None
- Suture kits
- Laparoscopic trainer
- Robot console trainer
- Mannequin-based simulation
- Other

---

Specify the kind of activities you are doing to help maintain your skills.

\_\_\_\_\_

## **ACGME CORE COMPETENCIES**

The last set of ranking questions relates to the six ACGME core competencies. The ACGME description of each competency is provided for your reference.

### **Patient Care**

**: Residents must be able to provide patient care that is compassionate, appropriate, and effective for the treatment of health problems and the promotion of health.**

### **Medical Knowledge**

**: Residents must be able to demonstrate knowledge about established and evolving biomedical, clinical, and cognate (e.g. epidemiological and social-behavioral) sciences and the application of this knowledge to patient care.**

### **Practice-Based Learning and Improvement**

**: Residents must be able to investigate and evaluate their patient care practices, appraise and assimilate scientific evidence, and improve their patient care practices.**

### **Interpersonal and Communication Skills**

**: Residents must be able to demonstrate interpersonal and communication skills that result in effective information exchange and teaming with patients, patients' families, and professional associates.**

### **Professionalism**

**: Residents must be able to demonstrate a commitment to carrying out professional responsibilities, adherence to ethical principles, and sensitivity to a diverse patient population.**

### **Systems-Based Practice**

**: Residents must be able to demonstrate an awareness of and responsiveness to the larger context and system of health care and the ability to effectively call on system resources to provide care that is of optimal value.**

## ACGME Core Competency Rank

**How would you rate the impact of the COVID-19 crisis and resultant re-deployments on each of the defined ACGME core competencies?**

|                                         | 1 Very Negative Impact | 2 Negative Impact     | 3 No Impact           | 4 Positive Impact     | 5 Very Positive Impact |
|-----------------------------------------|------------------------|-----------------------|-----------------------|-----------------------|------------------------|
| Patient Care                            | <input type="radio"/>  | <input type="radio"/> | <input type="radio"/> | <input type="radio"/> | <input type="radio"/>  |
| Medical Knowledge                       | <input type="radio"/>  | <input type="radio"/> | <input type="radio"/> | <input type="radio"/> | <input type="radio"/>  |
| Practice-Based Learning and Improvement | <input type="radio"/>  | <input type="radio"/> | <input type="radio"/> | <input type="radio"/> | <input type="radio"/>  |
| Interpersonal and Communication Skills  | <input type="radio"/>  | <input type="radio"/> | <input type="radio"/> | <input type="radio"/> | <input type="radio"/>  |
| Professionalism                         | <input type="radio"/>  | <input type="radio"/> | <input type="radio"/> | <input type="radio"/> | <input type="radio"/>  |
| Systems-Based Practice                  | <input type="radio"/>  | <input type="radio"/> | <input type="radio"/> | <input type="radio"/> | <input type="radio"/>  |

## Optional Comments and/or Feedback

Comments:

---
