# Supplementary material
Source: PubMed Central journal article supplement (PMC8445777)
Supplement: mmc2.pdf [file mmc2.pdf]

# Faculty Perceptions on the Impact of COVID-19 Crisis

## Faculty of Surgery, Anesthesia, and Surgical Subspecialty Residency Programs

Age

\_\_\_\_\_

Gender

- Male  
 Female

Faculty for Residency Program:

- General Surgery  
 Plastic Surgery  
 Cardiothoracic Surgery  
 Orthopedic Surgery  
 Oral Maxillofacial Surgery  
 Urology  
 Podiatry  
 Anesthesiology

Subspecialty (if applicable):

\_\_\_\_\_

Are you critically care trained?

- Yes  
 No

## COVID-19 PANDEMIC IMPACT (March 15 - May 4)

1 Strongly Disagree      2 Disagree      3 Neither Agree nor Disagree      4 Agree      5 Strongly Agree

Your operative volume significantly decreased during the COVID-19 pandemic?

- 

Were you redeployed outside of your specialty due to the COVID-19 pandemic?

- Yes  
 No

How were you redeployed?  
(Select all that apply)

- ICU (any critical care unit)  
 General surgery call  
 General medicine  
 Other

Specify your area of redeployment:

\_\_\_\_\_

## Involvement with Residents

|                                                                                          | 1 Not at all          | 2 Very little         | 3 Sometimes           | 4 Most of the time    | 5 All of the time     |
|------------------------------------------------------------------------------------------|-----------------------|-----------------------|-----------------------|-----------------------|-----------------------|
| I worked closely and often with residents and/or fellows prior to the COVID-19 pandemic. | <input type="radio"/> |
| I worked closely with residents and/or fellows during the COVID-19 pandemic.             | <input type="radio"/> |

---

What is the average number of operations and/or procedures that you performed with residents and/or fellows prior to the COVID-19 pandemic? (per week)

0  
 1-5  
 6-10  
 11-15  
 16-20  
 20+

---

What is the average number of operations and/or procedures that you performed with residents and/or fellows during the COVID-19 pandemic? (per week)

0  
 1-5  
 6-10  
 11-15  
 16-20  
 20+

## Assessment of Technical and Critical Care Skills

Do you believe the residents have experienced a reduction in operative (or anesthesia-based) technical skill due to the impact of the COVID-19 crisis?

Yes  
 No

---

|                                                                                           | 1 No Reduction        | 2 Very Little Reduction | 3 Moderate Reduction  | 4 Large Reduction     | 5 Very Large Reduction |
|-------------------------------------------------------------------------------------------|-----------------------|-------------------------|-----------------------|-----------------------|------------------------|
| How would you assess the impact on their operative (or anesthesia-based) technical skill? | <input type="radio"/> | <input type="radio"/>   | <input type="radio"/> | <input type="radio"/> | <input type="radio"/>  |

---

Do you believe the residents have experienced an improvement in the management of critical care patients due to the impact of the COVID-19 crisis?

Yes  
 No

---

|                                                                                     | 1 No Improvement      | 2 Very Little Improvement | 3 Moderate Improvement | 4 Large Improvement   | 5 Very Large Improvement |
|-------------------------------------------------------------------------------------|-----------------------|---------------------------|------------------------|-----------------------|--------------------------|
| How would you assess the impact on their ability to manage a critical care patient? | <input type="radio"/> | <input type="radio"/>     | <input type="radio"/>  | <input type="radio"/> | <input type="radio"/>    |

## Assessment of Progression and Readiness for Independent Practice

|                                                                                                                                                                                                                                          | 1 Not Confident       | 2 Somewhat Confident  | 3 Moderately Confident | 4 Very Confident      | 5 Extremely Confident |
|------------------------------------------------------------------------------------------------------------------------------------------------------------------------------------------------------------------------------------------|-----------------------|-----------------------|------------------------|-----------------------|-----------------------|
| How confident do you feel that the residents will be prepared to practice independently given the interruption in their training due to COVID-19?                                                                                        | <input type="radio"/> | <input type="radio"/> | <input type="radio"/>  | <input type="radio"/> | <input type="radio"/> |
| How confident are you that residents will be able to perform level-appropriate steps of an operation (or of providing anesthesia) after the COVID-19 pandemic, that they normally would have been able to perform prior to the pandemic? | <input type="radio"/> | <input type="radio"/> | <input type="radio"/>  | <input type="radio"/> | <input type="radio"/> |

## Optional Comments and/or Feedback

General Comments:

---
